# Supplementary material
Source: publisher figshare collection journal article supplement (https://gsapubs.figshare.com/ndownloader/files/23294522)
Supplement: Supplementary file 1 [file 23294522]

## Supplementary Materials:

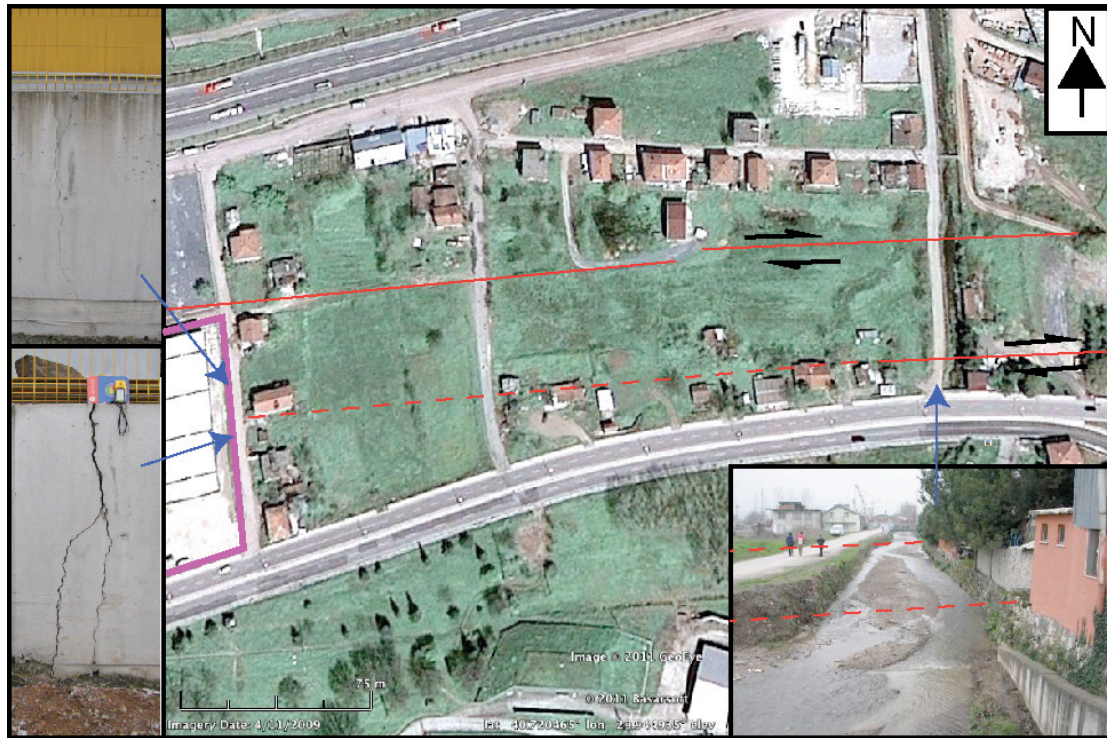

**Figure DR1.** Google Earth image (© 2011 Google, GeoEye, Başarsoft) and field photographs showing a deformed concrete wall (purple lines) built across the 1999 Izmit surface rupture zone (left panel) and a channel offset during the 1999 event (lower right panel) immediately south of Izmit. Red lines show coseismic fault trace.
